## Editorial

Oliver W. Hakenberg

Klinikum der Universität, Rostock, Germany

Professor Manfred Wirth, former chairman of the Department of Urology at Dresden University, has resigned from his post of Editor-in-Chief of *Urologia Internationalis* with the end of 2020, as has Professor Castro Diaz from Tenerife.

Manfred Wirth served this journal from 1998 until 2020 as the head of the team of Editors-in-Chief. During this time, *Urologia Internationalis* has developed extremely well. The impact factor rose from 0.228 in 1998 to currently above 1.6. The *Journal* enlarged, attracting more and more submissions. A more attractive layout was developed and implemented, and the number of pages increased significantly. *Urologia Internationalis* also entered a cooperation with the “Deutsche Gesellschaft für Urologie,” becoming its official English-language scientific journal.

David Castro-Diaz was co-Editor-in-Chief from 2007 to 2020. He significantly contributed to all the positive developments of *Urologia Internationalis*. His international input to the journal was always of great value.

All the developments show the good course that *Urologia Internationalis* took during the 22 years that Manfred Wirth led the team of Editors-in-Chief. Manfred

Wirth took me along to meet Thomas Nold from Karger at the EAU meeting in Stockholm in 1998, to discuss the future cooperation, the aims and scope of his taking-over to lead the *Journal*. From then on, every year at the annual EAU congress, we had a meeting of the Editors-in-Chief with Thomas Nold on strategic topics. These meetings were always amicable, but Manfred could be very insisting.

Also, the impact factor was always a point of discussion at these meetings, and at times we had bets on next year's impact factor, the winner who had been closest to the true number receiving a good bottle of red wine. We will all miss both Manfred Wirth and David Castro-Diaz for their good humor and valuable work they did with us.

With both of them leaving, Prof. Maximilian Burger, Head of the Department of Urology at Regensburg University, has now joined the team of Editors-in-Chief. Max Burger is an internationally well-known urologist with a focus on uro-oncology who has published widely and has a lot of experience in reviewing. His input will be greatly appreciated, and we are certain to continue steering our *Journal* on a good path forward.

Oliver W. Hakenberg
